# Supplementary material for: Inherited human RelB deficiency impairs innate and adaptive immunity to infection
Source: PubMed Central journal article supplement (PMC11406260; doi:10.1073/pnas.2321794121), 2024-09-04

Supplementary Figure 1

**A**

|                                                        |                            |                             |
|--------------------------------------------------------|----------------------------|-----------------------------|
| WES Analysis                                           | P1                         | P2                          |
| Annotated SNV                                          | 170,504                    | 199,275                     |
| Filter out MAF > 0.01 from gnomAD                      | 8,273                      | 18,450                      |
| Removal of non coding, synonymous variants or reads <5 | 722                        | 526                         |
| Remove high GDI and low MSC score                      | 459                        | 348                         |
|                                                        | 8 hom.<br>38 comp.<br>het. | 17 hom.<br>76 comp.<br>het. |

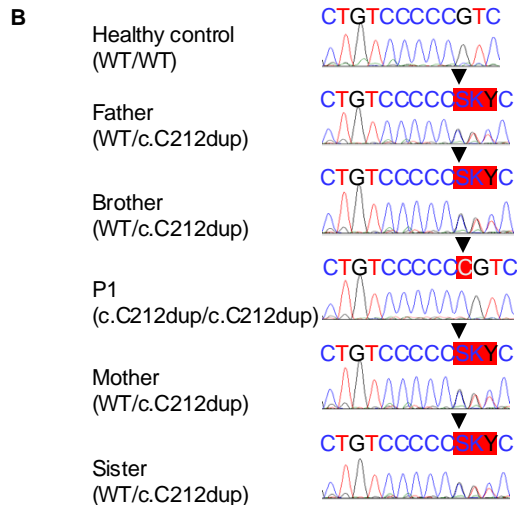

**C**

|                        |                                   |  |                                    |  |
|------------------------|-----------------------------------|--|------------------------------------|--|
|                        | <b>E145</b>                       |  | <b>P364</b>                        |  |
| <i>H. sapiens</i>      | 133 PKQ RGMRF RYEC EGRSAGSILG 154 |  | 353 VHRQIAIVFKT P PYEDLEIVEP 374   |  |
| <i>P. troglodytes</i>  | 133 PKQ RGMRF RYEC EGRSAGSILG 154 |  | 353 VHRQIAIVFKT P PYEDLEIVEP 374   |  |
| <i>N. leucogenys</i>   | 133 PKQ RGMRF RYEC EGRSAGSILG 154 |  | 353 VHRQIAIVFKT P PYEDLEIVEP 374   |  |
| <i>Macaca</i>          | 133 PKQ RGMRF RYEC EGRSAGSILG 154 |  | 353 VHRQIAIVFKT P PYEDLEIVEP 374   |  |
| <i>R. norvegicus</i>   | 133 PKQ RGMRF RYEC EGRSAGSILG 154 |  | 353 VHRQIAIVFKT P PYEDLEISEP 374   |  |
| <i>M. musculus</i>     | 133 PKQ RGMRF RYEC EGRSAGSILG 154 |  | 353 VHRQIAIVFKT P PYEDLEISEP 374   |  |
| <i>C. familiaris</i>   | 133 PKQ RGMRF RYEC EGRSAGSILG 154 |  | 353 VHRQIAIVFKT P PYEDLEIVEP 374   |  |
| <i>O. anatinus</i>     | 133 PKQ RGMRF RYEC EGRSAGSILG 154 |  | 353 VHRQIAIVFKT P PYEDLEIPAP 374   |  |
| <i>Frog</i>            | 133 PKQ RGMRF RYQCEGRSAGSILG 154  |  | 353 VHRQIAIVLKT P PYHDLHIT EP 374  |  |
| <i>T. lineatus</i>     | 133 PKQ RGMRF RYEC EGRSAGSILG 154 |  | 353 VHRQIAIVFKT P PYQDQDIQEE 374   |  |
| <i>D. rerio</i>        | 133 PKERGMRF RYEC EGRSAGSILG 154  |  | 353 VHRQIAIVFKS P PFRE QDILE E 374 |  |
| <i>D. melanogaster</i> | 133 PTSNIIRFR YKCEGR TAGSILG 154  |  | 353 VFKQMAIAFKT P RYRNTEITQS 374   |  |

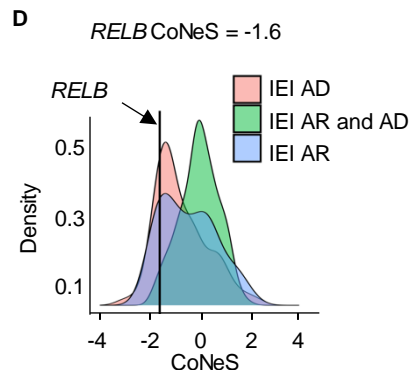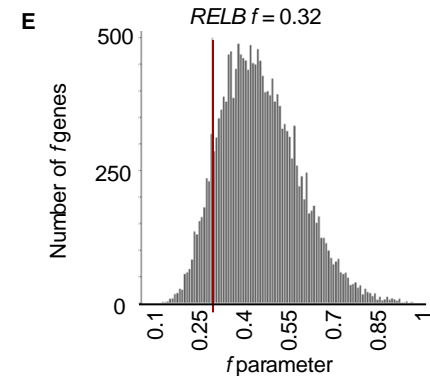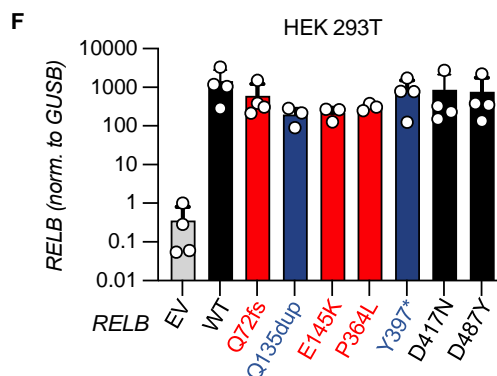

Supplementary Figure 2

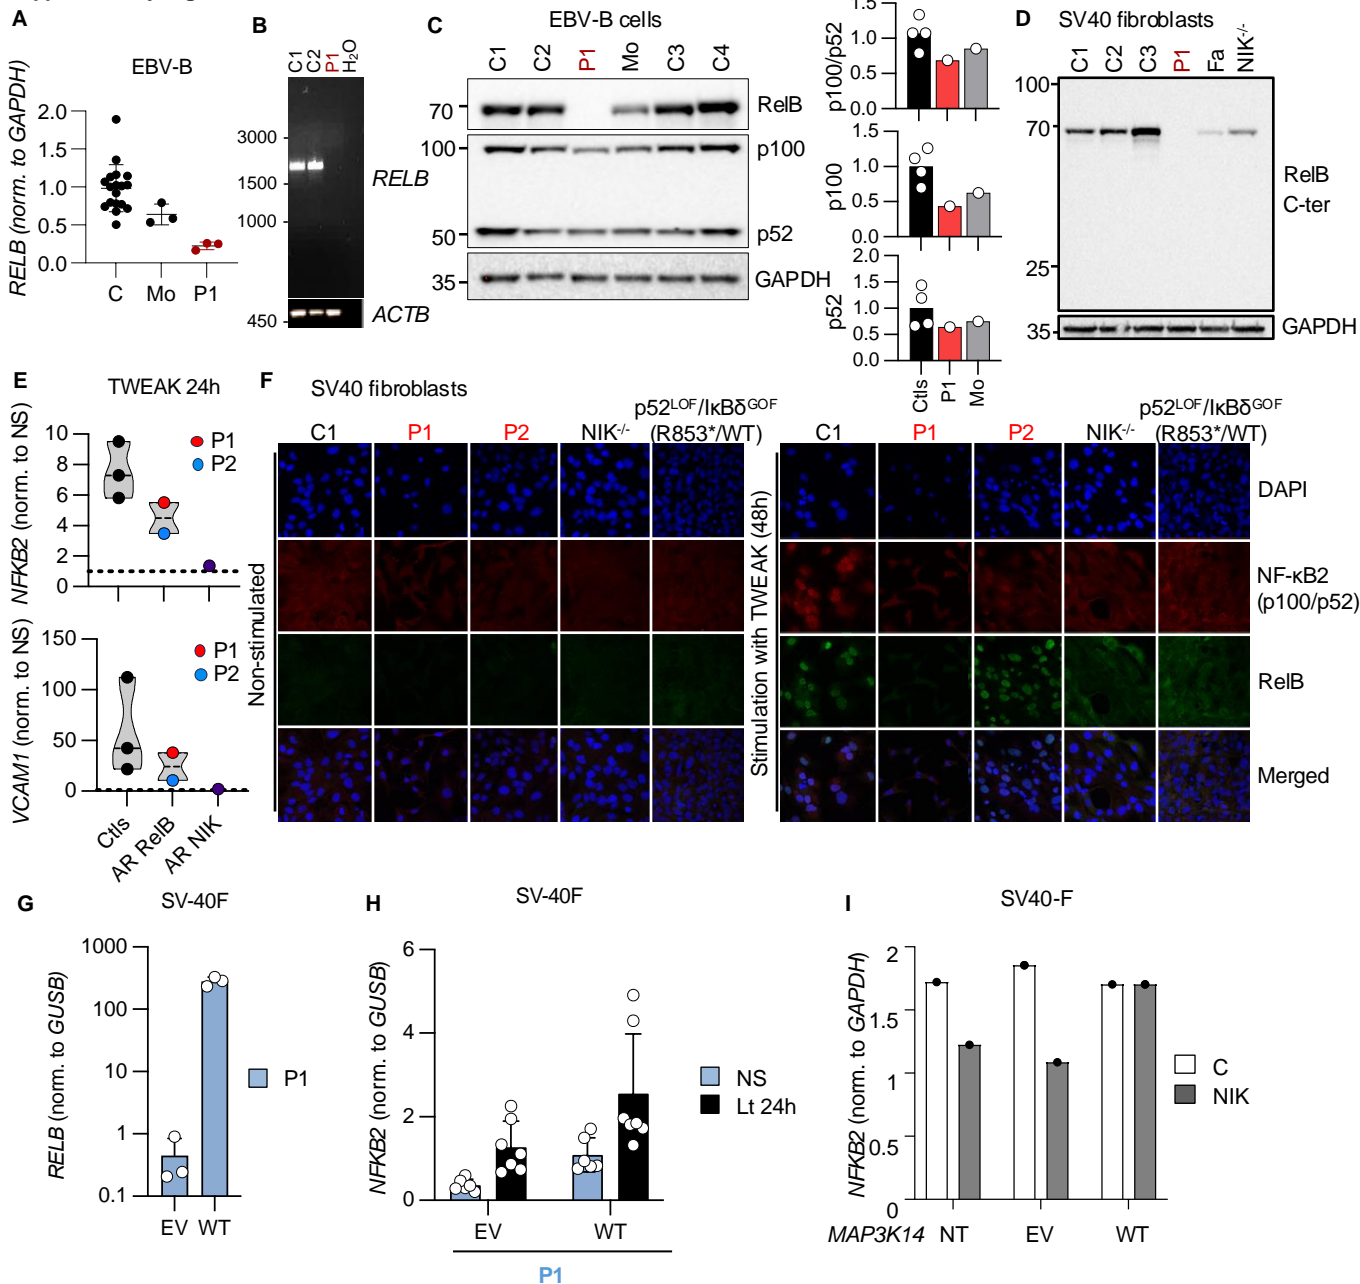

**Supplementary Figure 3**

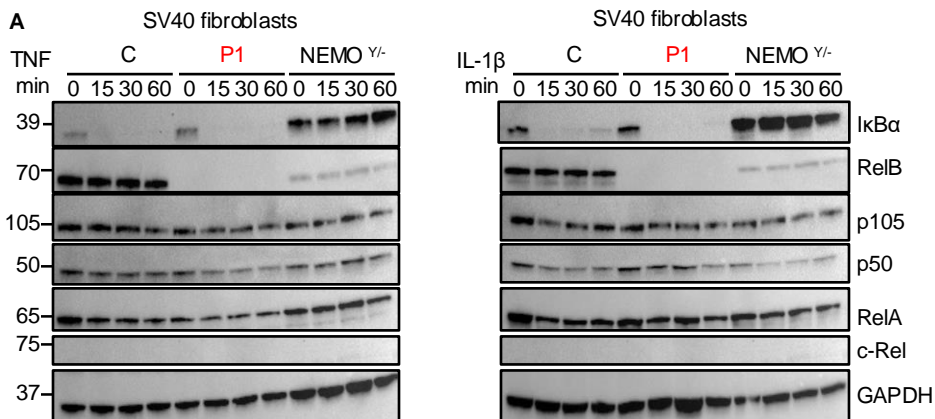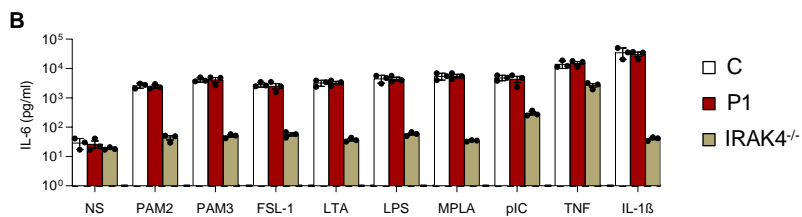

Supplementary Figure 4

Enriched auto-Abs in patients with AR ReIB deficiency

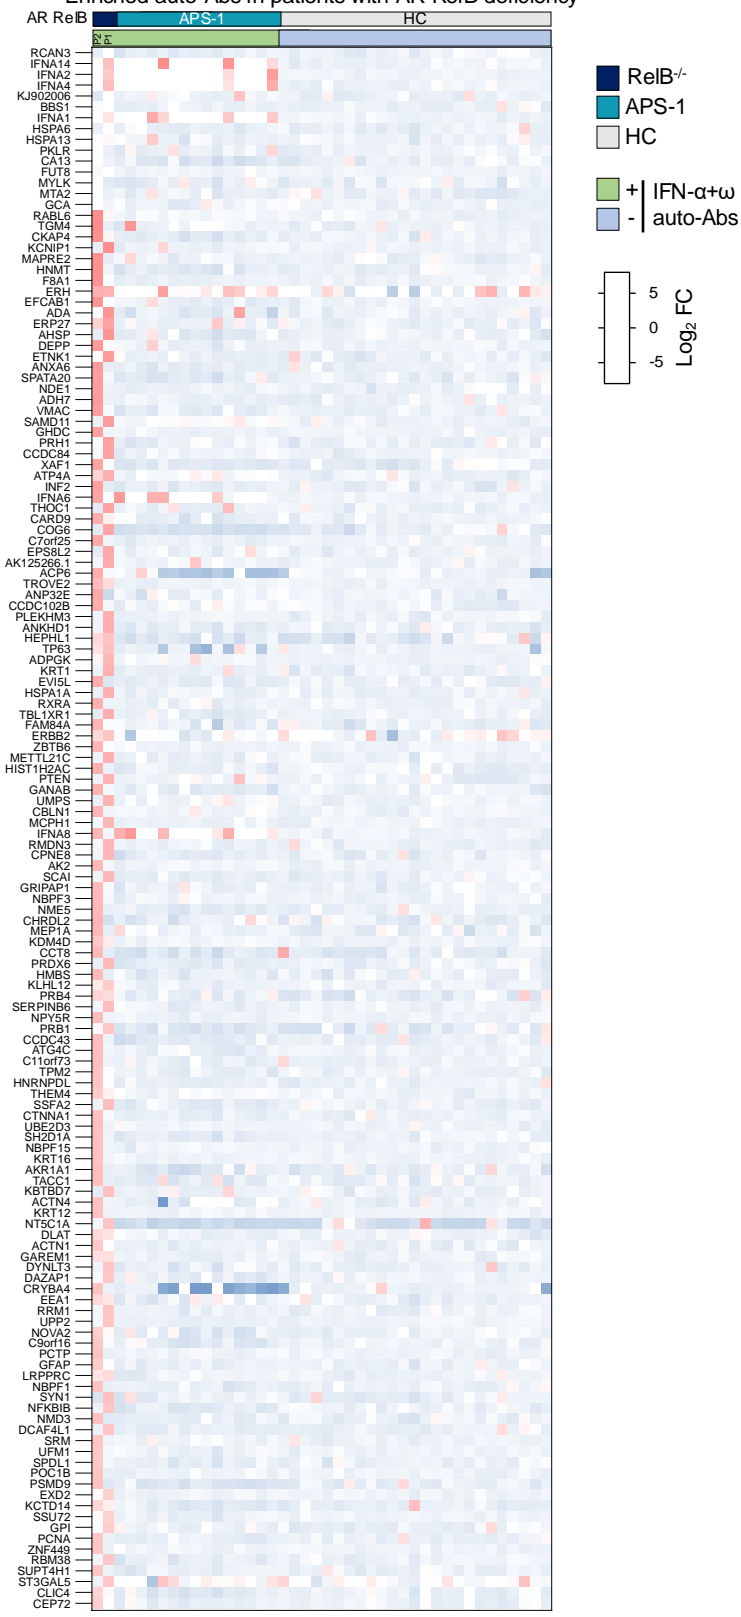

Supplementary Figure 5

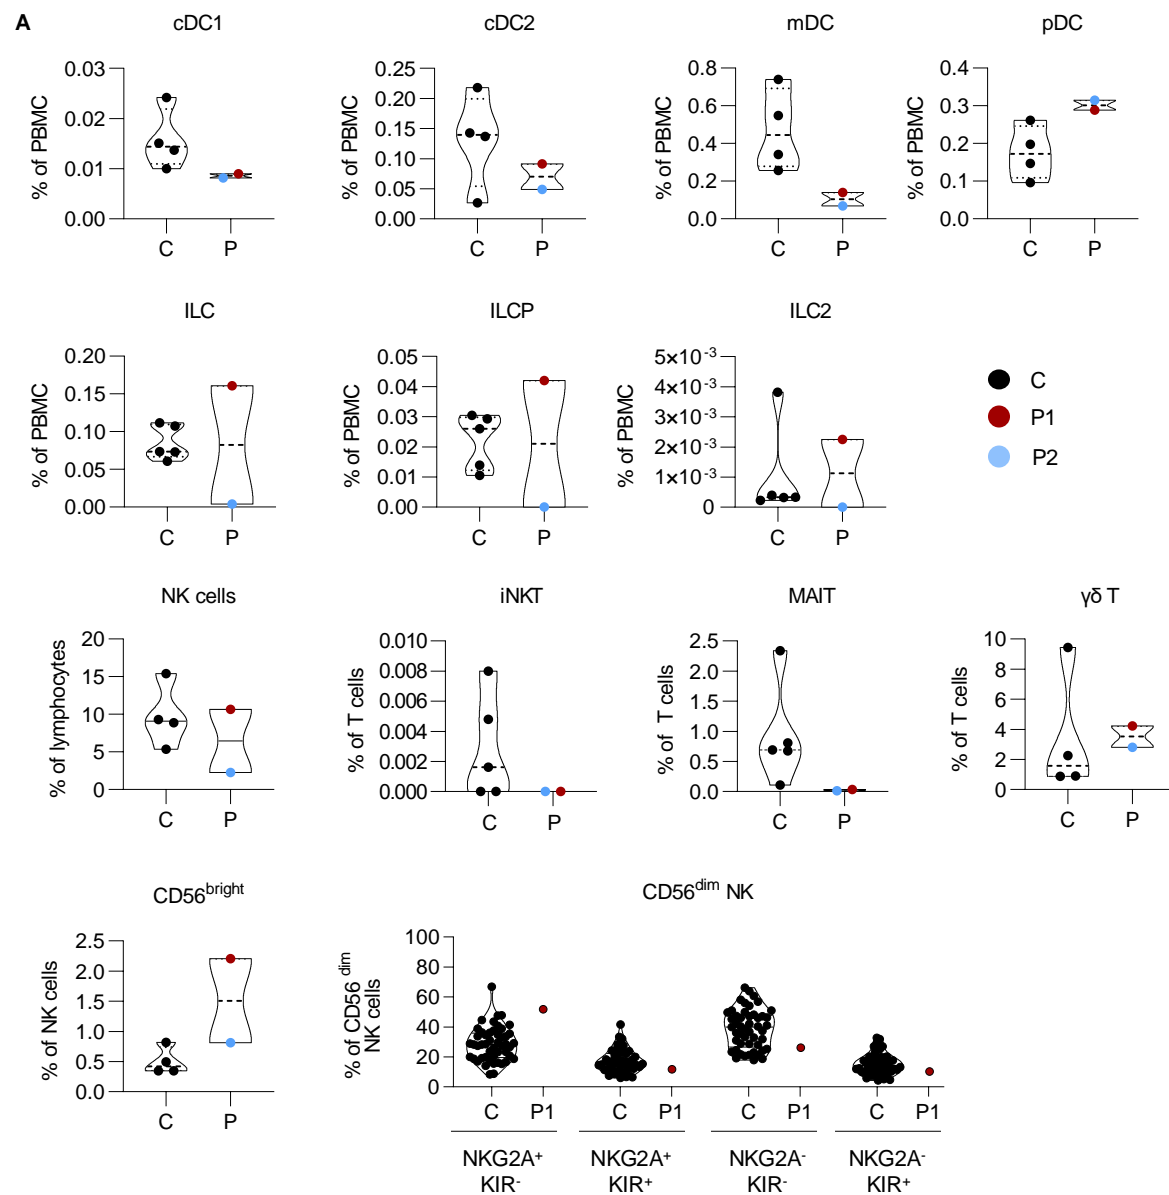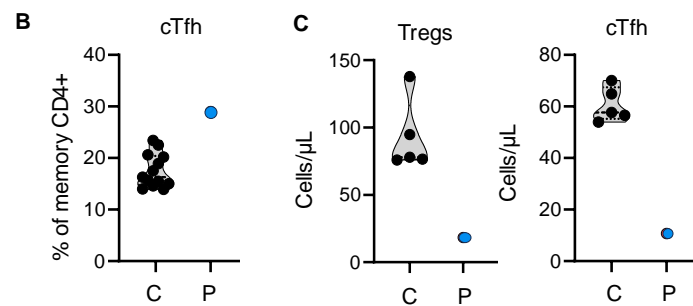

**Supplementary Figure 6**

● C ● P1 pre-HSCT

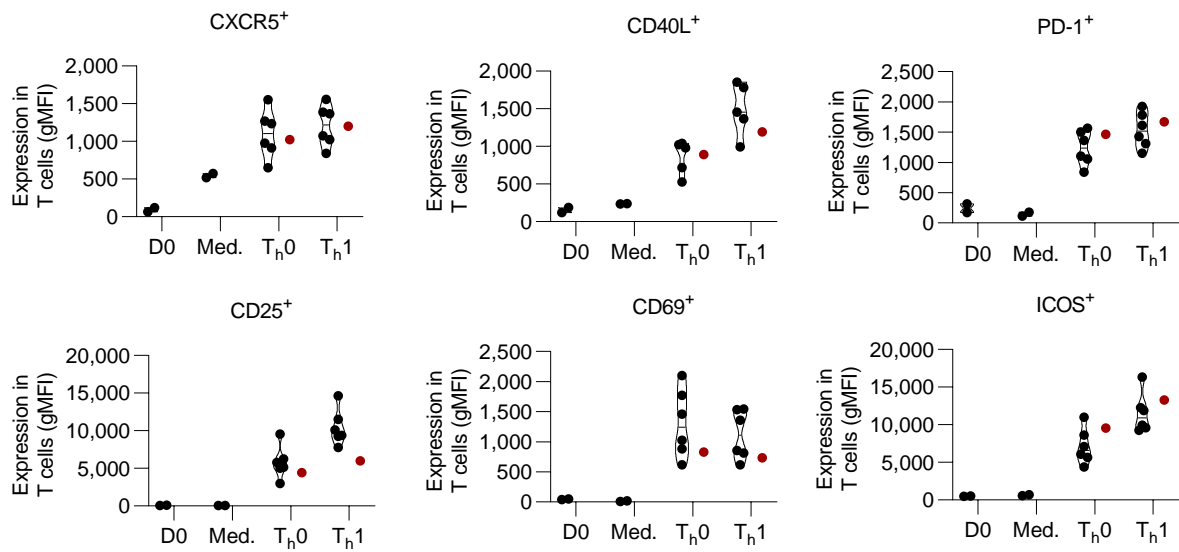

Supplementary Figure 7

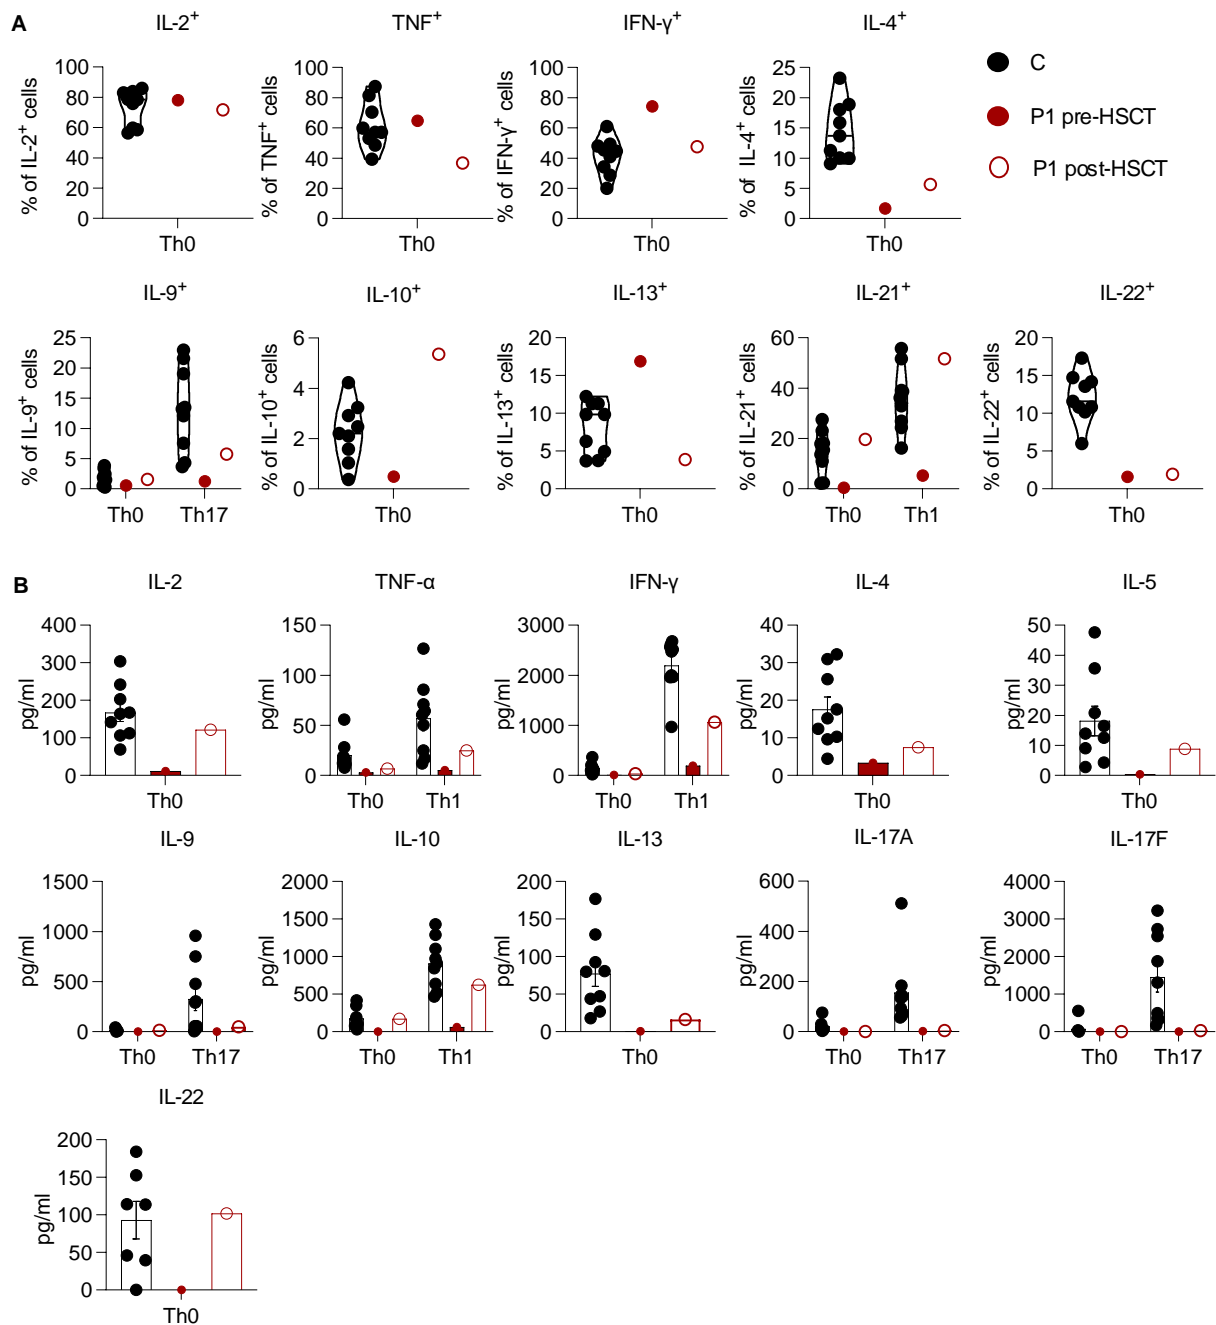

Supplementary Figure 8

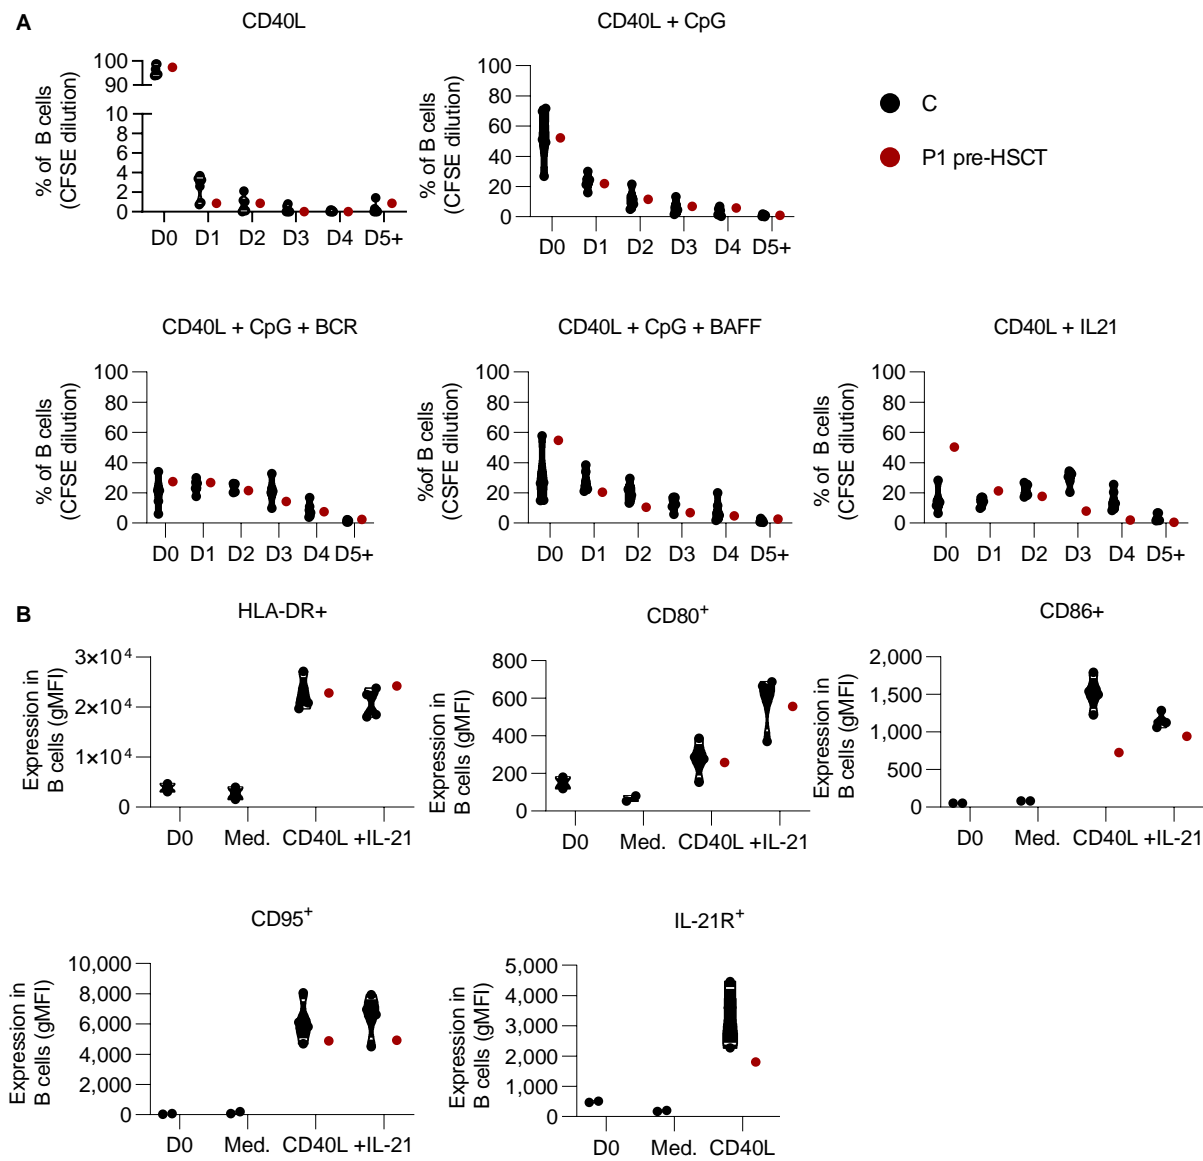

Supplement: pnas.2321794121.sapp2.pdf [file pnas.2321794121.sapp2.pdf]
